# Supplementary material for: Synthesis and evaluation of the SERS effect of Fe3O4–Ag Janus composite materials for separable, highly sensitive substrates
Source: Royal Society of Chemistry journal article supplement (doi:10.1039/c8ra09569h), 2019-01-01
Supplement: c8ra09569h1.pdf [file c8ra09569h1.pdf]

## Supporting information

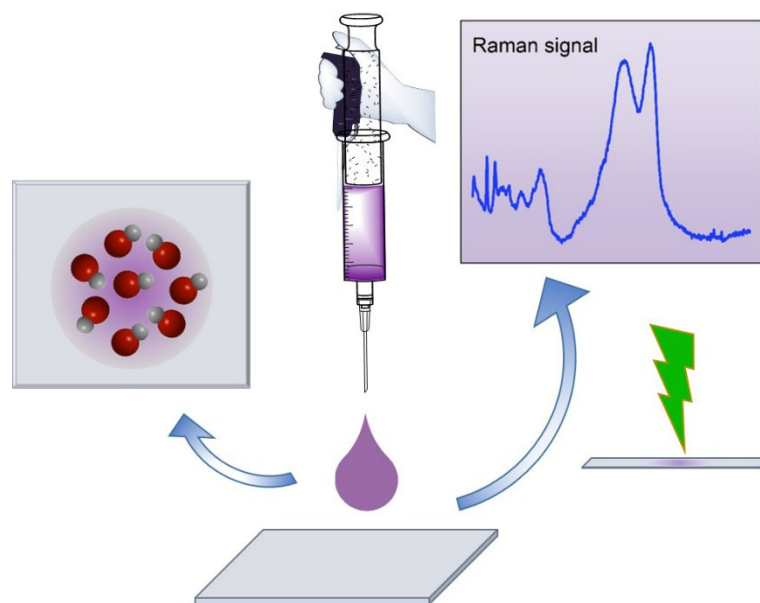

Fig. S1 The schematic illustration of how to prepare the samples for SERS tests.

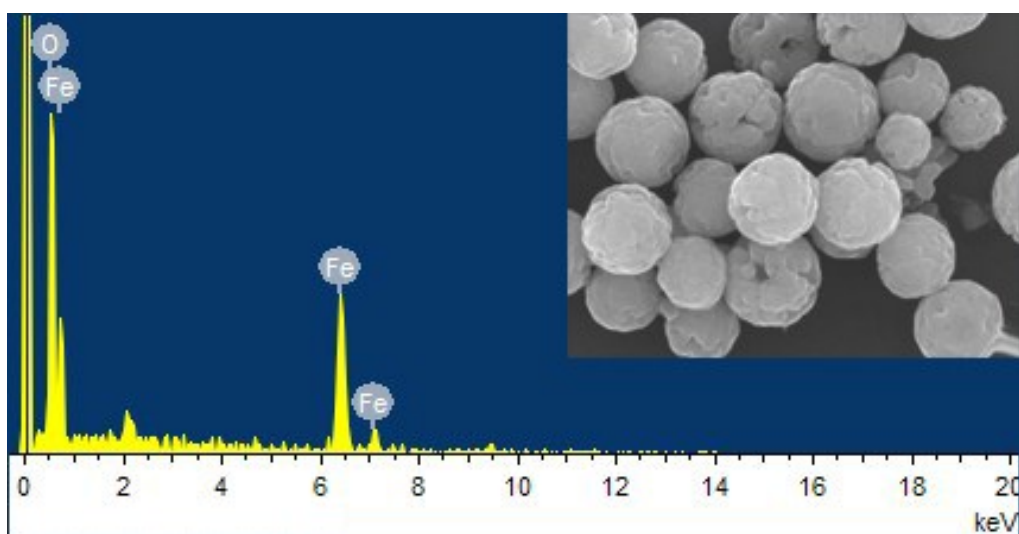

Fig. S2 EDX patterns of Fe<sub>3</sub>O<sub>4</sub>.

| Element | Weight<br>Percentage | Atom<br>Percentage |
|---------|----------------------|--------------------|
| O K     | 30.37                | 59.02              |
| Fe K    | 69.63                | 40.98              |
| Amounts | 100.00               | 100.00             |

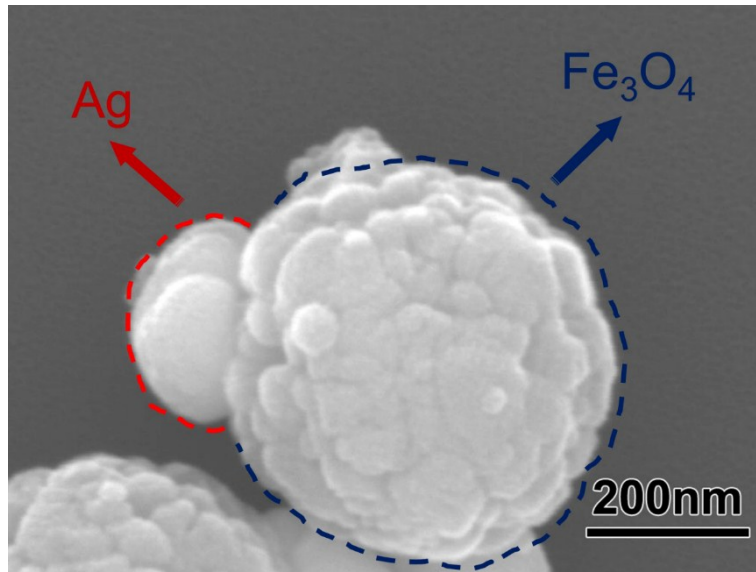

Fig. S3 Fe<sub>3</sub>O<sub>4</sub>-Ag Janus structure in SEM image.

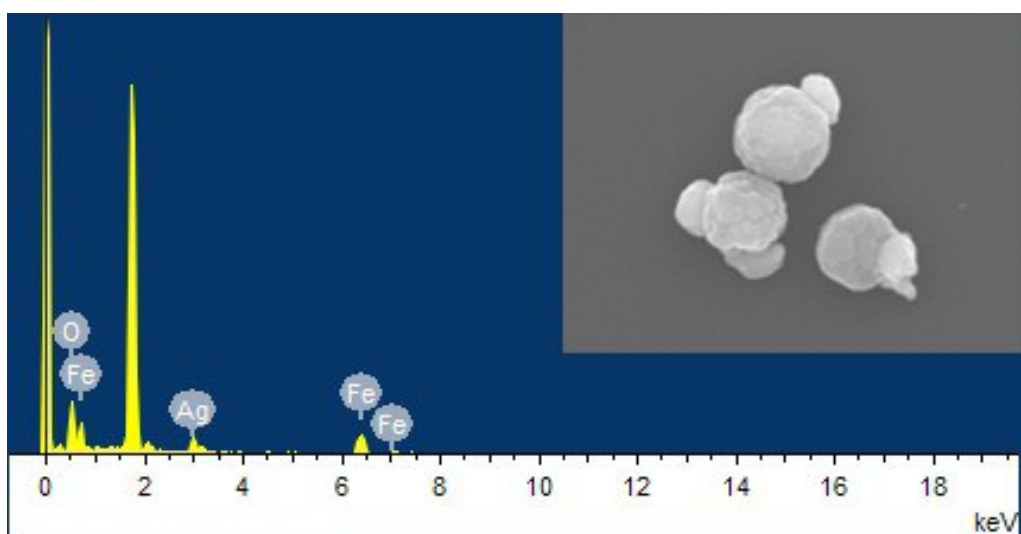

Fig. S4 EDX patterns of Fe<sub>3</sub>O<sub>4</sub>-Ag Janus 10.

| Element | Weight<br>Percentage | Atom<br>Percentage |
|---------|----------------------|--------------------|
| O K     | 22.87                | 48.51              |
| Fe K    | 29.29                | 36.44              |
| Ag L    | 47.84                | 15.05              |
| Amounts | 100.00               | 100.00             |

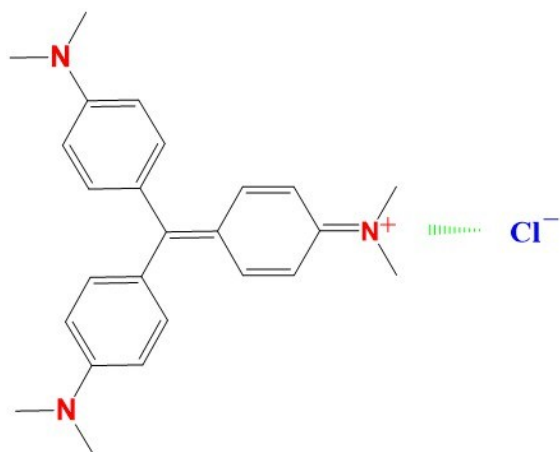

Fig. S5 The structural formula of CV molecule.

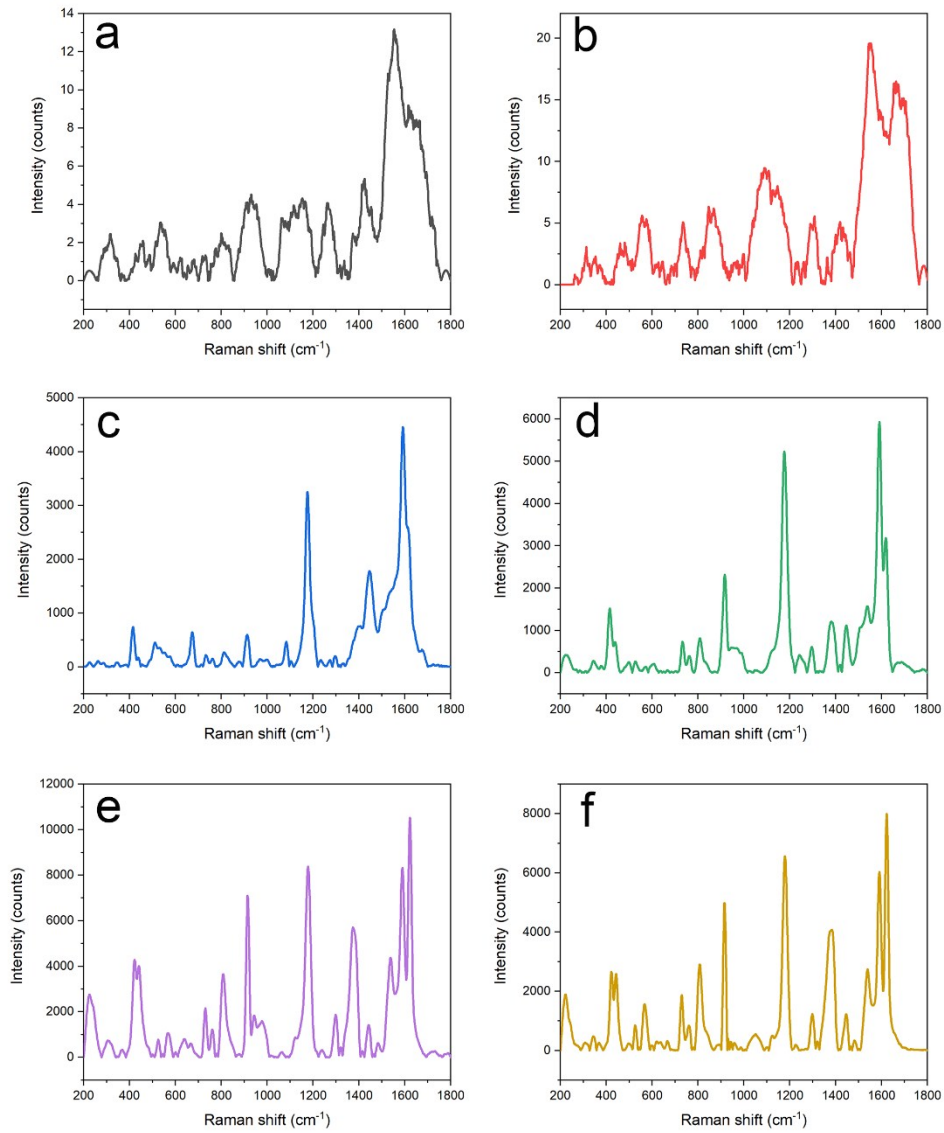

Fig. S6 SERS spectra for CV (a), Fe<sub>3</sub>O<sub>4</sub> (b), Fe<sub>3</sub>O<sub>4</sub>-Ag Janus 1h (c), Fe<sub>3</sub>O<sub>4</sub>-Ag Janus 6h (d), Fe<sub>3</sub>O<sub>4</sub>-Ag Janus 10h (e), Fe<sub>3</sub>O<sub>4</sub>-Ag Janus 20h (f), respectively.

Tab. S1 Analysis of the vibrational assignment corresponding to the peak position of Raman

| Wavenumbers/cm <sup>-1</sup> | Vibrational assignment                                        |
|------------------------------|---------------------------------------------------------------|
| 420,440                      | Out-plane vibration of C-phenyl bend                          |
| 526, 563, 914                | Ring skeletal vibration of radical orientation                |
| 732, 760, 810                | Out of plane vibration of ring C-H bend                       |
| 1179                         | In plane vibration of ring C-H                                |
| 1300                         | Phenyl ring C-C stretching                                    |
| 1375                         | N-phenyl stretching                                           |
| 1443                         | Phenyl ring C-C stretching + ring deformation                 |
| 1539                         | Phenyl ring C-C stretching+ =N <sup>+</sup> Phenyl stretching |
| 1589                         | Phenyl ring C-C stretching and bend                           |
| 1622                         | Phenyl ring C-C stretching+ N-phenyl stretching               |

Tab. S2 The values of Raman intensity in the wavenumber of  $1622\text{cm}^{-1}$  and calculated Raman EF of samples

| Sample                  | Intensity ( $1622\text{cm}^{-1}$ ) | EF                 |
|-------------------------|------------------------------------|--------------------|
| CV                      | 8                                  | /                  |
| $\text{Fe}_3\text{O}_4$ | 12                                 | $1.79 \times 10^6$ |
| Janus 1h                | 2047                               | $3.04 \times 10^8$ |
| Janus 6h                | 2926                               | $4.35 \times 10^8$ |
| Janus 10h               | 10527                              | $1.57 \times 10^9$ |
| Janus 20h               | 7994                               | $1.19 \times 10^9$ |



Tab. S3 Comparison of SERS detection limit or EF with different reported references

| SERS substrates                                                    | Probe molecules    | Detection limit         | EF                                          |
|--------------------------------------------------------------------|--------------------|-------------------------|---------------------------------------------|
| Ag-coated Fe <sub>3</sub> O <sub>4</sub> microspheres <sup>1</sup> | 4-ATP              | 1.0×10 <sup>-12</sup> M | /                                           |
| Ag@Fe <sub>3</sub> O <sub>4</sub> nanospheres <sup>2</sup>         | R6G                | 1.0×10 <sup>-11</sup> M | /                                           |
| Ag-Fe <sub>3</sub> O <sub>4</sub> nanohybrids <sup>3</sup>         | 2-naphthalenethiol | /                       | 1.14 ×10 <sup>3</sup>                       |
| Fe <sub>3</sub> O <sub>4</sub> -Ag Janus microspheres <sup>4</sup> | Thiram             | 1.0×10 <sup>-7</sup> M  | /                                           |
| Ag-Fe <sub>3</sub> O <sub>4</sub> nanocomposites <sup>5</sup>      | CV                 | 1.0×10 <sup>-9</sup> M  | /                                           |
| Ag-decorated α-Fe <sub>2</sub> O <sub>3</sub> NFs <sup>6</sup>     | R6G                | 10 <sup>-10</sup> M     | 8.1×10 <sup>6</sup>                         |
| Ag/Fe <sub>3</sub> O <sub>4</sub> nanocomposites <sup>7</sup>      | R6G, MB            | /                       | 1.58×10 <sup>8</sup> , 1.46×10 <sup>8</sup> |
| Our sample (Fe <sub>3</sub> O <sub>4</sub> -Ag Janus)              | CV                 | > 10 <sup>-13</sup> M   | 1.57×10 <sup>9</sup>                        |

## References

1. L. Yang, Z. Bao, Y. Wu and J. Liu, *Journal of Raman Spectroscopy*, 2012, **43**, 848-856.
2. L. Sun, J. He, S. An, J. Zhang and D. Ren, *Journal of Molecular Structure*, 2013, **1046**, 74-81.
3. J. Huang, Y. Sun, S. Huang, K. Yu, Q. Zhao, F. Peng, H. Yu, H. Wang and J. Yang, *Journal of Materials Chemistry*, 2011, **21**.
4. X. L. Zhang, C. Y. Niu, Y. Q. Wang, S. M. Zhou and J. Liu, *Nanoscale*, 2014, **6**, 12618-12625.
5. C. Fan, S. Zhu, H. Xin, Y. Tian and E. Liang, *Journal of Optics*, 2017, **19**.
6. D. Bekana, R. Liu, S. Li, Y. Lai and J.-F. Liu, *Analytica Chimica Acta*, 2018, **1006**, 74-82.
7. Y. Shan, Y. Yang, Y. Cao and Z. Huang, *RSC Advances*, 2015, **5**, 102610-102618.
